# Supplementary material for: Bio-inspired synthesis of α-Ni(OH)2 nanobristles on various substrates and their applications
Source: Royal Society of Chemistry journal article supplement (doi:10.1039/c5ta09329e), 2016-01-01
Supplement: c5ta09329e1.pdf [file c5ta09329e1.pdf]

# Bio-Inspired Synthesis of $\alpha$ -Ni(OH)<sub>2</sub> Nanobristles on Various Substrates and Their Applications

Xinghua Meng; Da Deng\*

Department of Chemical Engineering and Materials Science, Wayne State University,  
5050 Anthony Wayne Dr, Detroit, MI, United States, 48202

\*E-mail: da.deng@wayne.edu

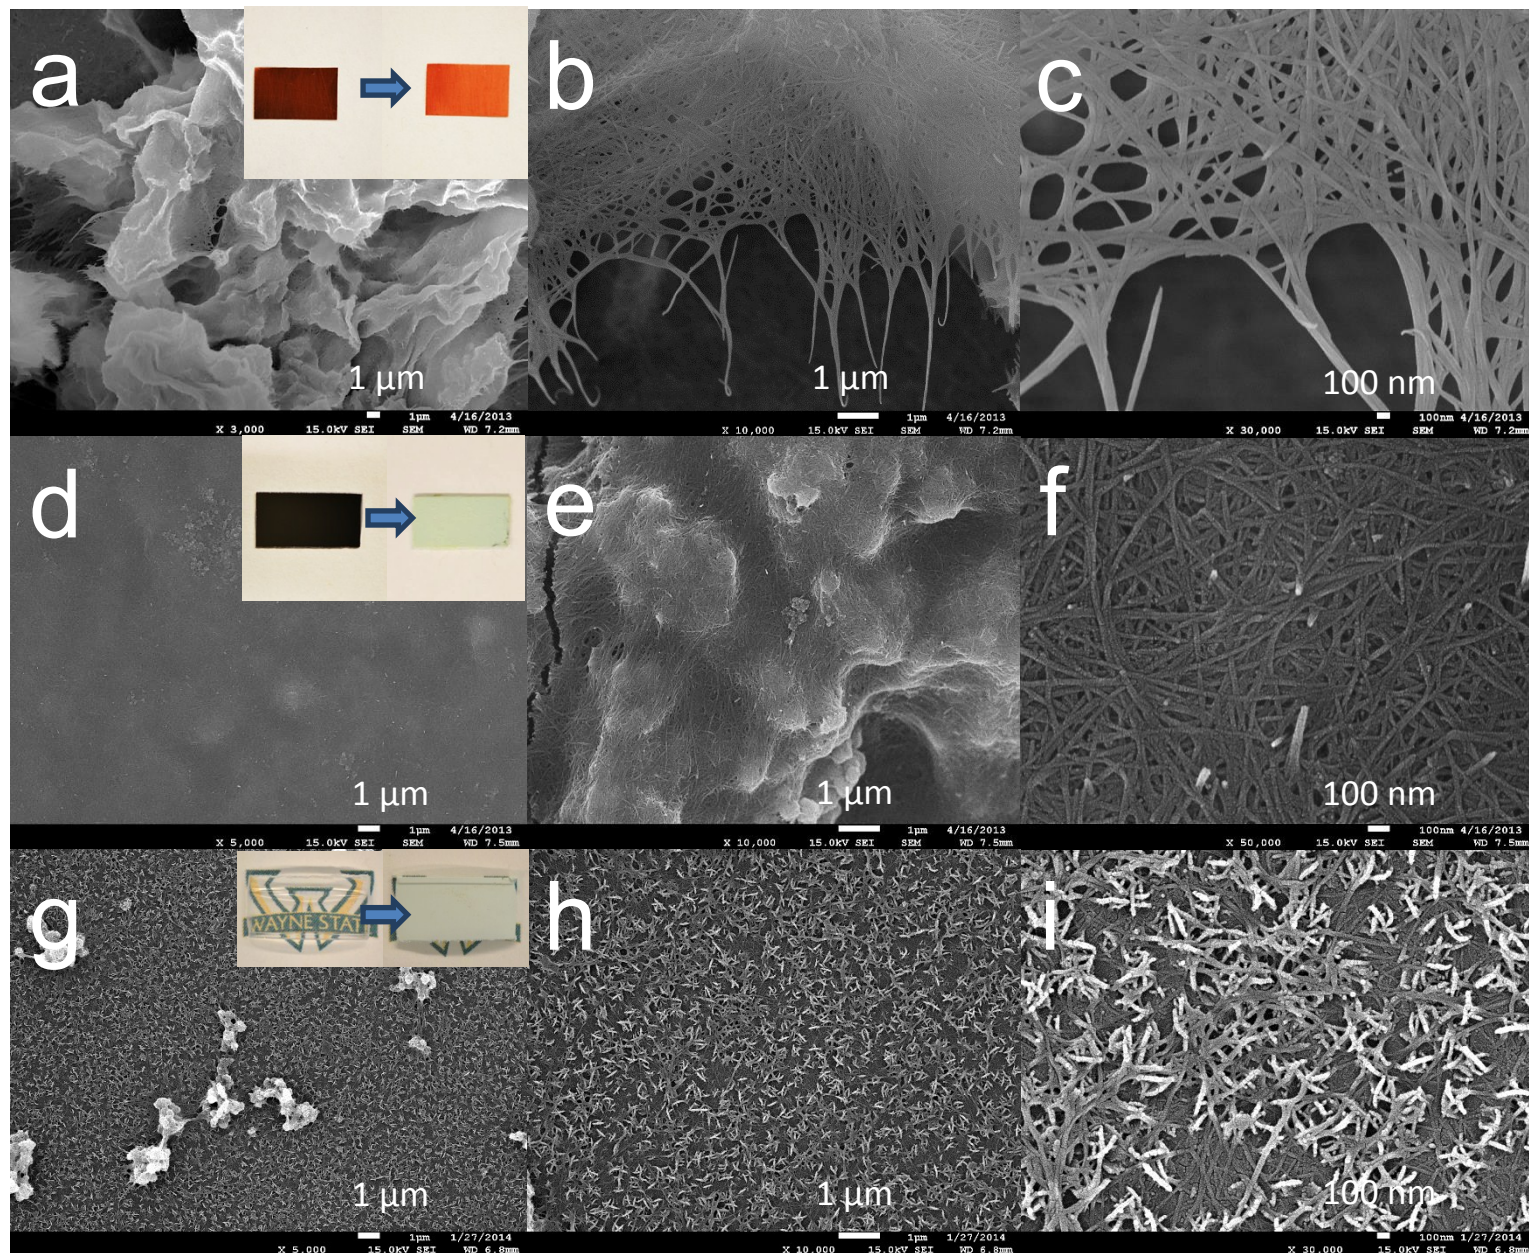

**Figure S1.** FESEM images of as-deposited  $\alpha$ -Ni(OH)<sub>2</sub> nanobristles grown on various other substrates at different magnifications: (a, b, c) on Cu foil, (d, e, f) on silicon wafer, (g, h, i) on PET plastic. The inserts are the optical images of the corresponding substrates to demonstrate the color change before and after coating with  $\alpha$ -Ni(OH)<sub>2</sub> nanobristles by membrane-assisted synthesis.

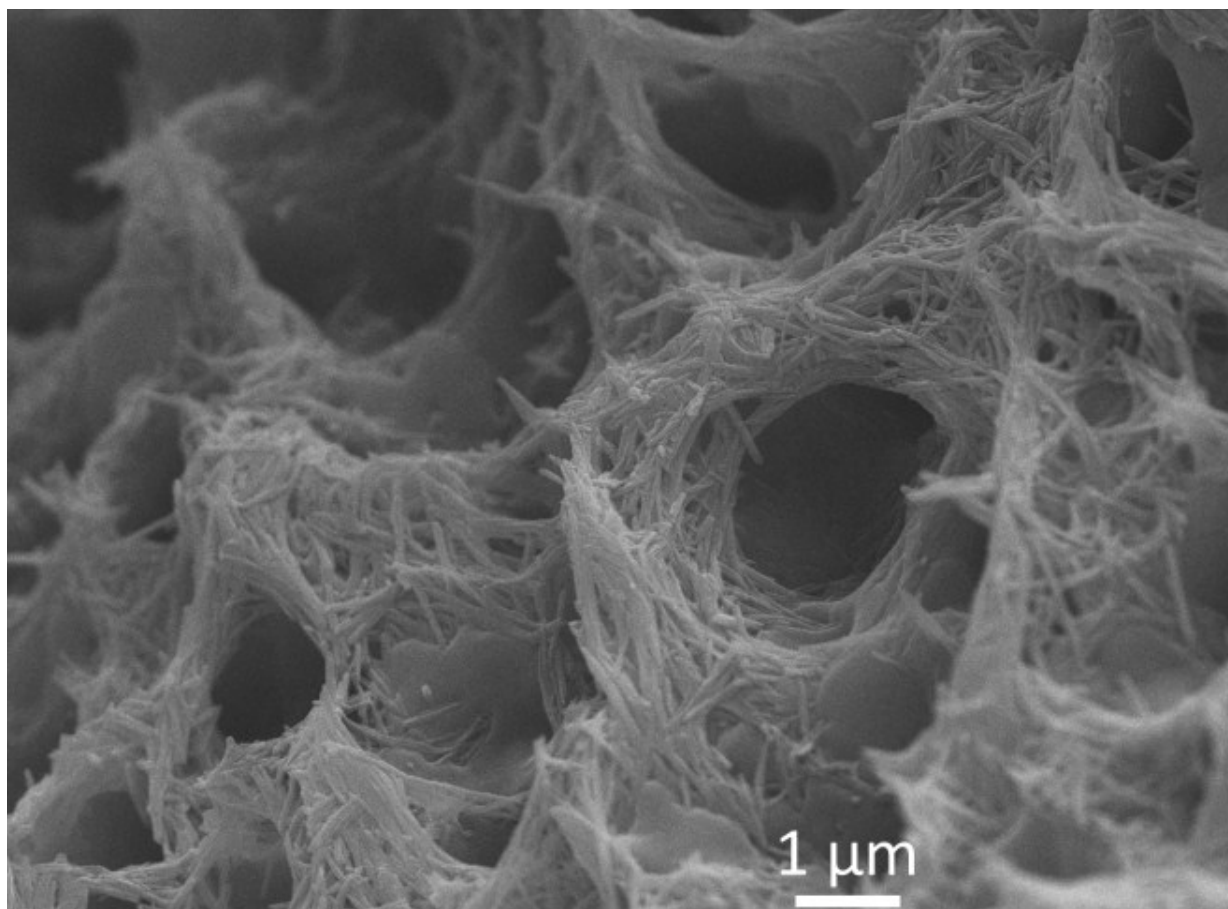

**Figure S2.** FESEM image of the surface of  $\alpha$ -Ni(OH)<sub>2</sub> electrodes after 1000 cycles of electrochemical test as an electrode for supercapacitors.

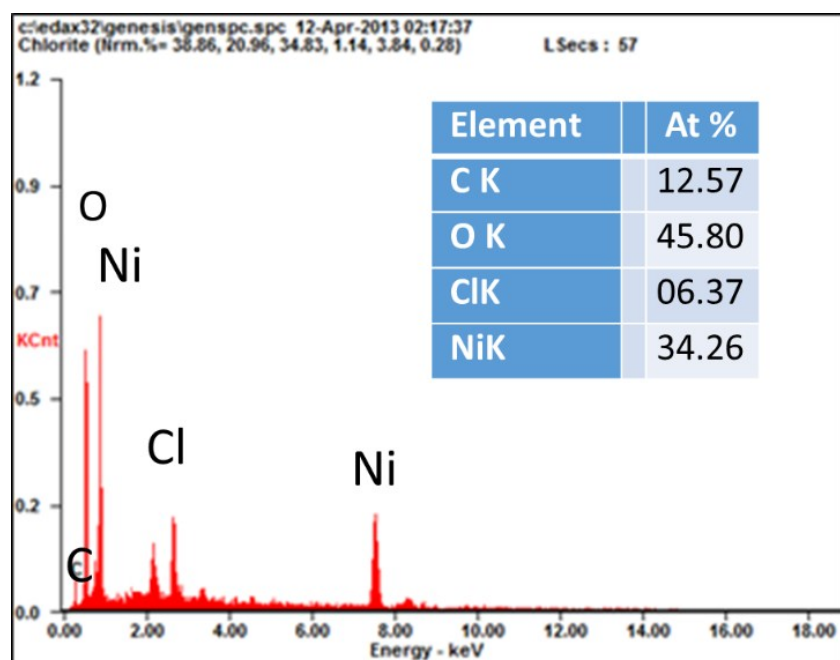

**Figure S3.** EDS analysis of  $\alpha$ -Ni(OH)<sub>2</sub> nanobrisltes showing the presence of Cl<sup>-</sup> anions intercalated.

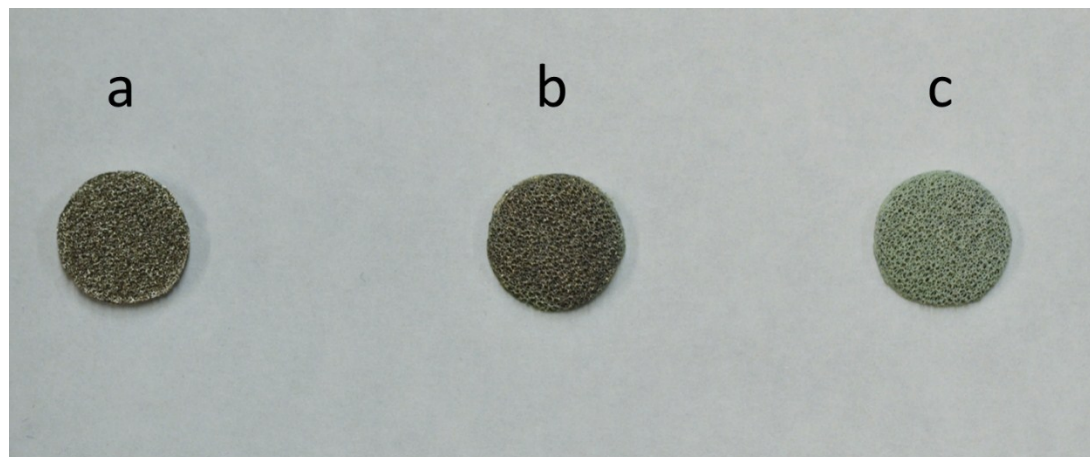

**Figure S4.** Optical images of Ni foams: a piece of (a) bare foam, (b) foam after reaction without the presence of CTAB, (c) foam after reaction in the chamber with 5 mM CTAB, indicating the importance of CTAB for growth of  $\alpha$ -Ni(OH)<sub>2</sub> nanobrisltes on Ni foams.



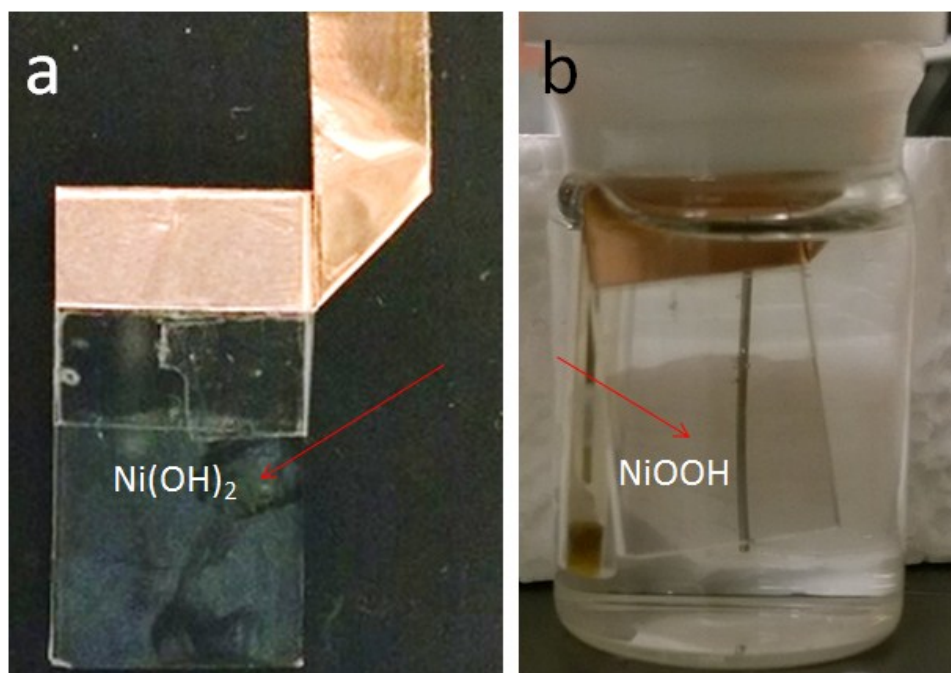

**Figure S5.** The optical images showing the color of (a) the as formed  $\text{Ni(OH)}_2$  nanostructures on ITO glass with light green in color, and (b) electrochemically converted into  $\text{NiOOH}$  with light brown in color, suggesting another potential application could be electrochromic devices.

The reversible reaction involved for the color change could be  $\text{Ni(OH)}_2 + \text{OH}^- \leftrightarrow \text{NiOOH} + \text{H}_2\text{O} + \text{e}^-$ .<sup>1</sup>  $\text{Ni(OH)}_2$  is green, while the  $\text{NiOOH}$  is brown in color.<sup>2</sup> Our exploration is very preliminary at this stage on electrochromic applications. However, the results show that (1) our method can form  $\text{Ni(OH)}_2$  nanostructures on ITO glass and (2) color change can be tuned electrochemically. Our on-going effort is to improve our experimental systems and collect more results which will be report once available.

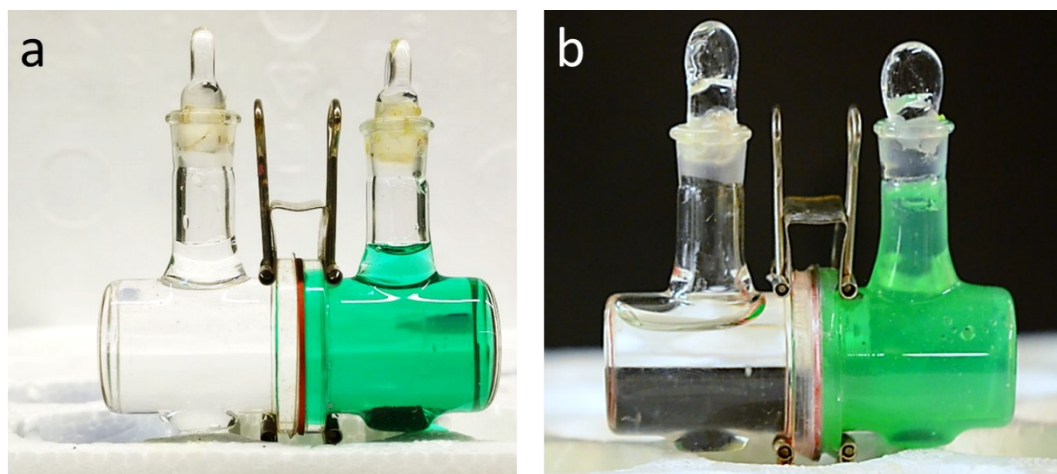

**Figure S6.** Optical images of the experimental chambers: (a) right after filled by the two solutions, and (b) after 5 days reaction at 50 °C. Note the osmosis effect leading to the volume increase in the left chamber of  $\text{NiCl}_2$  solution. The Nafion exposed to  $\text{NaOH}$  would trapped any  $\text{Ni}$  cations transferred forming  $\text{Ni}(\text{OH})_2$  before the  $\text{Ni}$  cation could be transferred into the alkali chamber.

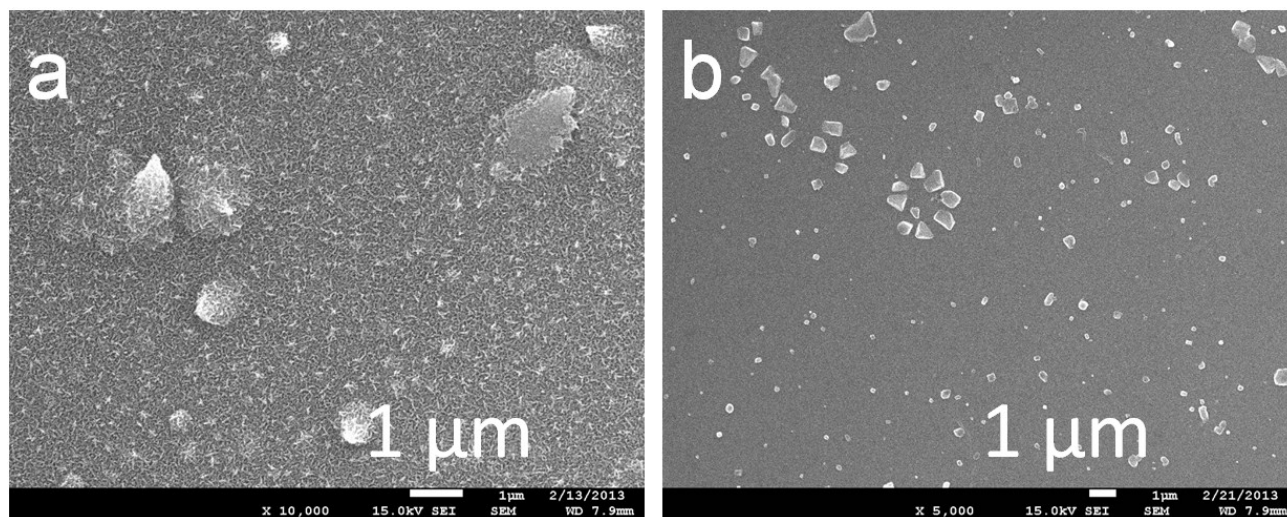

**Figure S7.** FESEM images of side of Nafion membrane facing different chambers: (a) side exposed to  $\text{NiCl}_2$  solution, (b) side exposed to  $\text{NaOH}$  solution. The side of Nafion membrane exposed to  $\text{NiCl}_2$  solution has nanobristles, in contrast to that of the side of Nafion membrane exposed to  $\text{NaOH}$  solution.

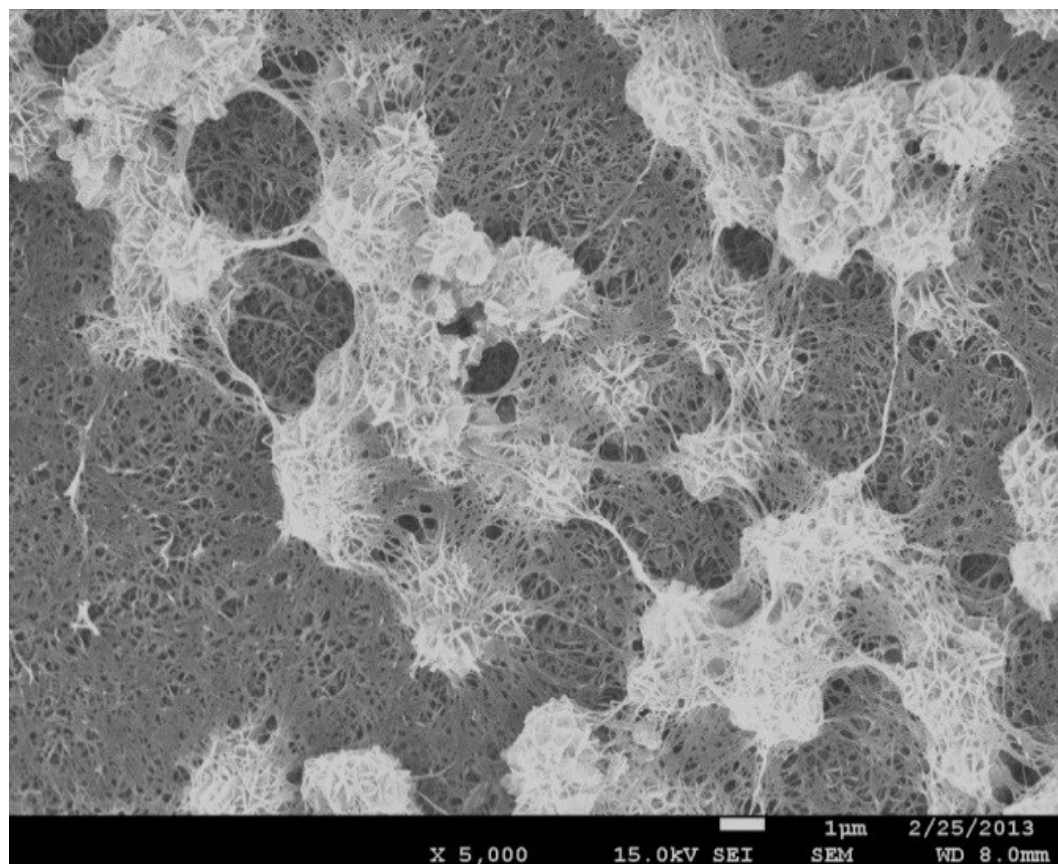

**Figure S8.** FESEM images of as-deposited  $\text{Ni}(\text{OH})_2$  on Nafion membrane in the absence of CTAB.

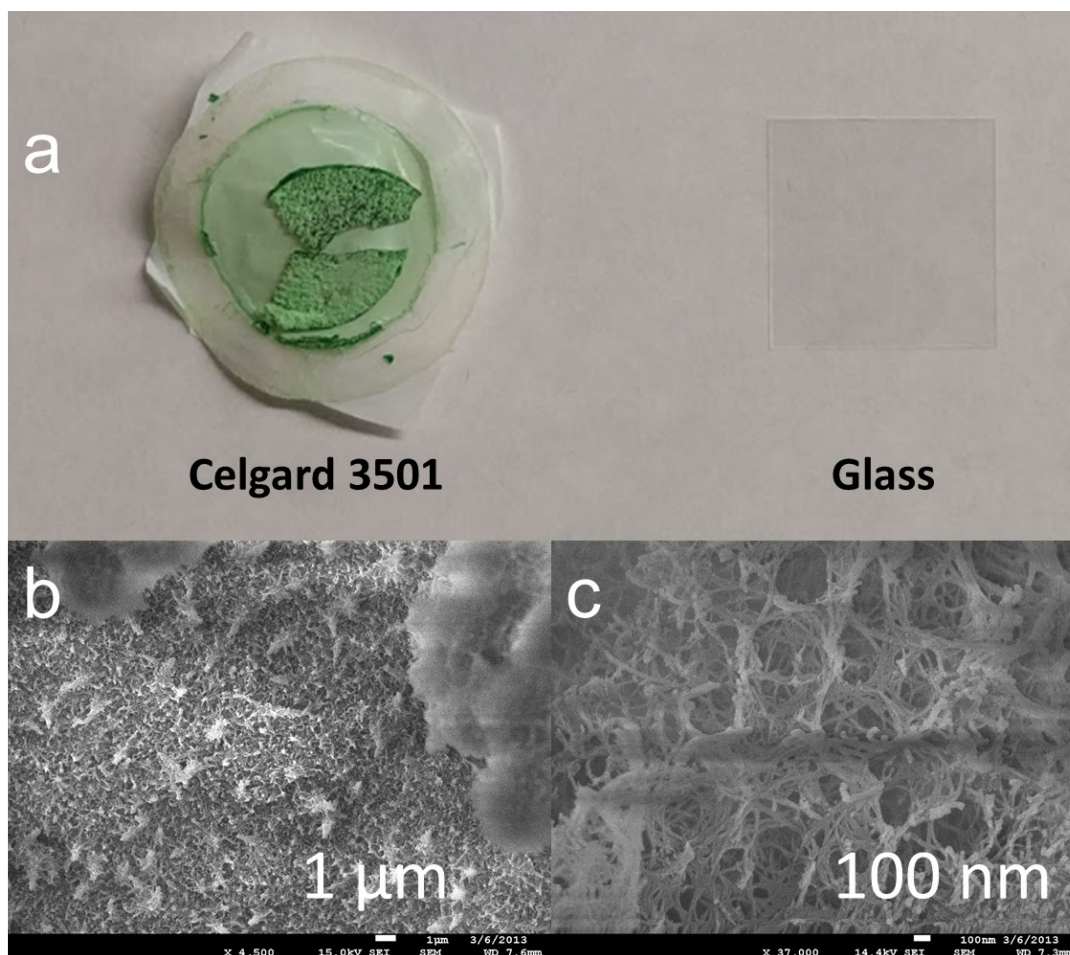

**Figure S9.** (a) Optical image of: (left) Celgard 3501 membrane with deposited  $\text{Ni(OH)}_2$  and (right) glass inserted in the  $\text{NiCl}_2$  solution chamber without any observed deposition. (b, c) FESEM images of nanostructured  $\text{Ni(OH)}_2$  on Celgard 3501. We have tried Celgard battery separator, instead of Nafion membrane, under the same experimental conditions. Similar green color  $\text{Ni(OH)}_2$  could form on the surface of the Celgard membrane (left). The deposited  $\text{Ni(OH)}_2$  was thick and cracked upon drying. FESEM images show that the as formed  $\text{Ni(OH)}_2$  is in the form of nanowires. However, there was no  $\text{Ni(OH)}_2$  formed on the inserted glass (right). Therefore, Nafion is still needed in order to form  $\text{Ni(OH)}_2$  nanobristles on the substrates. Our ongoing effort is to gain better understanding on the formation mechanism.



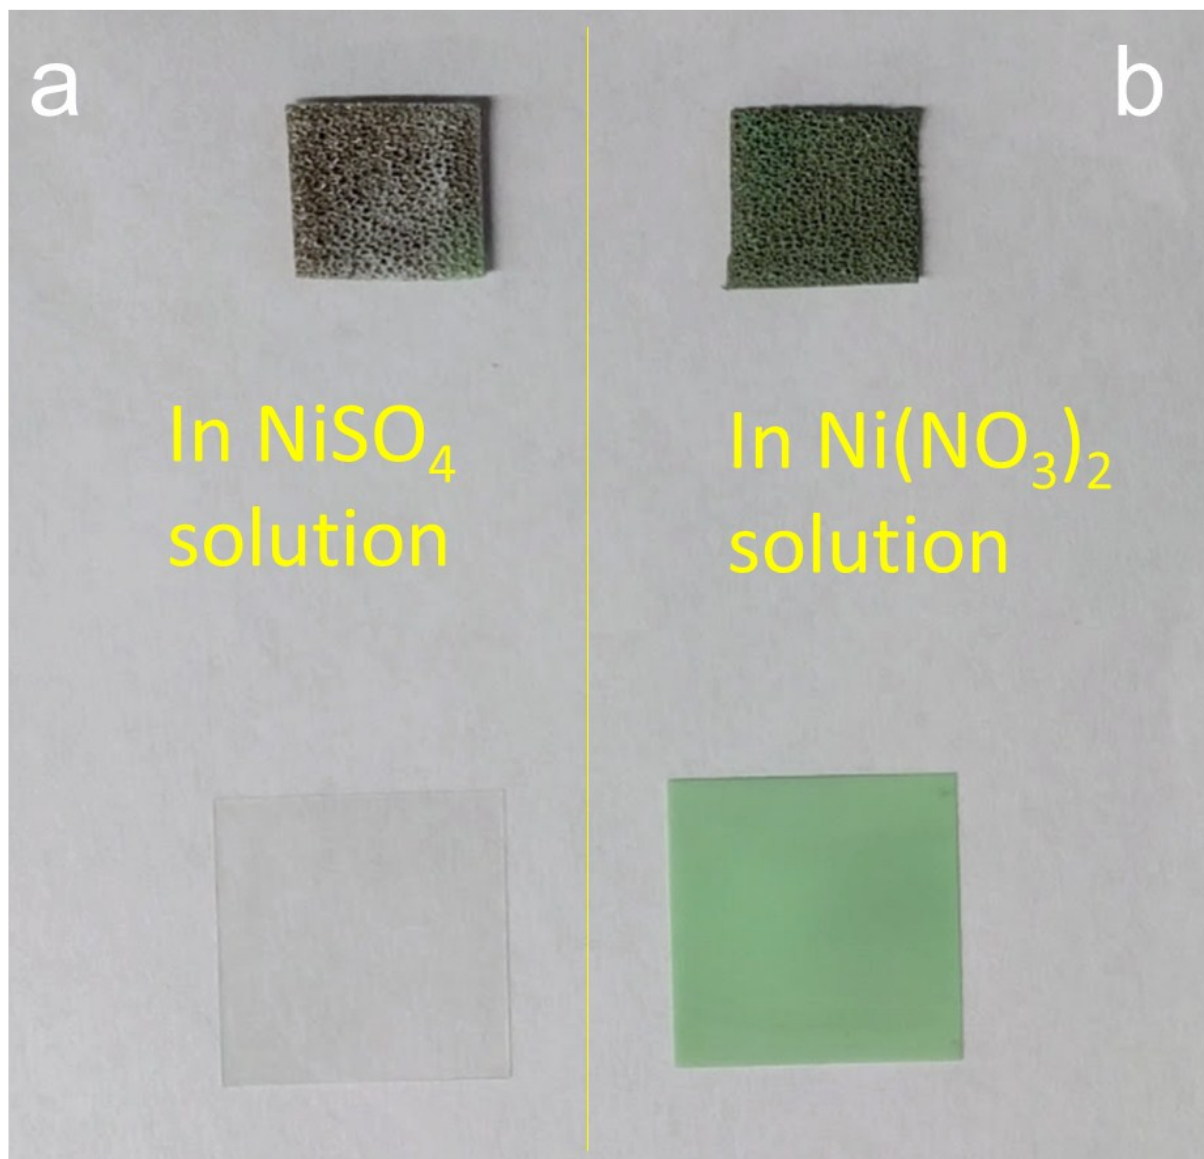

**Figure S10.** Optical images of as-deposited glass and Ni foam using different salts (a)  $\text{NiSO}_4$  and (b)  $\text{Ni}(\text{NO}_3)_2$  under the same experimental conditions. We have also carried out additional experiments to explore the effects of different anions. Instead of  $\text{NiCl}_2$ , we have also explored the use of  $\text{NiSO}_4$  and  $\text{Ni}(\text{NO}_3)_2$ , while keeping all other experimental conditions unchanged. In the case of  $\text{Ni}(\text{NO}_3)_2$ , green color  $\text{Ni}(\text{OH})_2$  were formed and uniformly coated on both Ni foam and glass substrate (right). In the case of  $\text{NiSO}_4$ , no formation of  $\text{Ni}(\text{OH})_2$  on glass substrate was observed and the Ni foam was not uniformly coated with green color  $\text{Ni}(\text{OH})_2$  (left). It is known that the anions could significantly affect the structures of  $\text{Ni}(\text{OH})_2$  formed.<sup>3</sup> We are currently working on to gain better understanding. The coating on glass is very uniform in the case of using  $\text{Ni}(\text{NO}_3)_2$  salt.



1. S. D. Min, C. J. Zhao, Z. M. Zhang, G. R. Chen, X. Z. Qian and Z. P. Guo, *J. Mater. Chem. A*, 2015, **3**, 3641-3650.
2. M. Z. Sialvi, R. J. Mortimer, G. D. Wilcox, A. M. Teridi, T. S. Varley, K. G. U. Wijayantha and C. A. Kirk, *ACS Applied Materials & Interfaces*, 2013, **5**, 5675-5682.
3. J. W. Lee, J. M. Ko and J. D. Kim, *J. Phys. Chem. C*, 2011, **115**, 19445-19454.
